# Supplementary material for: Integration of Transcriptome and Methylome Analyses Provides Insight Into the Pathway of Floral Scent Biosynthesis in Prunus mume
Source: Front Genet. 2021 Dec 15;12:779557. doi: 10.3389/fgene.2021.779557 (PMC8714837; doi:10.3389/fgene.2021.779557)
Supplement: Supplementary file 3 [file Table9.xlsx]

## Sheet: Table S9
Table S9 Primer sequences used for qRT-PCR
Genename	GeneID	Primers F	Primers R
PP2A	Pm029033	GGTCTCAGATGAGGGAGGGT	ACCGCAGTTCCGTCTTCAAT
PmCFAT1c	Pm030672	GCTGCCACTCTCCCACCCTG	TGGACAGCCAGCACCCCATG
PmEGS4	Pm029006	AATTGGCCGCACCCTTCCCA	CATCGTGAGGGCCCTCCACG
PmBEAT36	Pm011009	AGCTGAGTTCGTGACGGCCC	GCACAGCAAGCAACGGGAGC
PmCNL1	Pm012986	CCGCCACAAGGTCACCCACA	GGCCATACGCGTGGGTCACT
PmCNL23	Pm023842	CGCTGGCCGATTCTCTGCCT	ACTCTTCCAGCCGCGCCAAT
PmPAL1	Pm030127	AAAGGTCAGGTCACCGGGCG	CACCGTTCCAGCCCTCGAGG
