# Supplementary material for: Integration of Transcriptome and Methylome Analyses Provides Insight Into the Pathway of Floral Scent Biosynthesis in Prunus mume
Source: Front Genet. 2021 Dec 15;12:779557. doi: 10.3389/fgene.2021.779557 (PMC8714837; doi:10.3389/fgene.2021.779557)
Supplement: Supplementary file 9 [file Table8.xlsx]

## Sheet: Sheet1
Genename
Pm010967_PmBEAT
Pm011011_PmBEAT
Pm006850_PmBEAT
Pm010998_PmBEAT
Pm010976_PmBEAT
Pm010996_PmBEAT
Pm011009_PmBEAT
Pm011010_PmBEAT
Pm026103_PmBEAT
Pm006860_PmBEAT
Pm006862_PmBEAT
Pm013822_PmBEAT
Pm011005_PmBEAT
Pm011001_PmBEAT
Pm016126_PmBEAT
Pm003732_PmBEAT
Pm013827_PmBEAT
Pm013820_PmBEAT
Pm006894_PmBEAT
Pm008812_PmBEAT
Pm027450_PmBEAT
Pm018886_PmBEAT
Pm018954_PmBEAT
Pm013834_PmBEAT
Pm016771_PmBEAT
Pm002535_PmBEAT
Pm008312_PmBEAT
Pm008809_PmBEAT
Pm016033_PmBEAT
Pm016042_PmBEAT
Pm016045_PmBEAT
Pm026398_PmBEAT
Pm026402_PmBEAT
Pm026403_PmBEAT
Pm026406_PmBEAT
Pm028582_PmBEAT
Pm013137_PmBEAT
Pm019293_PmBEAT
Pm003510_PmBEAT
Pm004403_PmBEAT
Pm011003_PmBEAT
Pm010122_PmBEAT
Pm011004_PmBEAT
Pm007839_PmBEAT
Pm023354_PmBEAT
Pm006849_PmBEAT
Pm006868_PmBEAT
Pm006869_PmBEAT
Pm010966_PmBEAT
Pm010974_PmBEAT
Pm010975_PmBEAT
Pm010989_PmBEAT
Pm006854_PmBEAT
Pm010994_PmBEAT
Pm011503_PmBEAT
Pm006858_PmBEAT
Pm006859_PmBEAT
Pm010968_PmBEAT
Pm010971_PmBEAT
Pm010973_PmBEAT
Pm010977_PmBEAT
Pm010979_PmBEAT
Pm010980_PmBEAT
Pm010984_PmBEAT
Pm010985_PmBEAT
Pm010986_PmBEAT
Pm010988_PmBEAT
Pm010990_PmBEAT
Pm010992_PmBEAT
Pm006857_PmBEAT
Pm025400_PmBEAT
Pm025606_PmBEAT
Pm025612_PmBEAT
Pm014352_PmBEAT
Pm016036_PmBEAT
Pm016046_PmBEAT
Pm016048_PmBEAT
Pm016482_PmBEAT
Pm016484_PmBEAT
Pm020331_PmBEAT
Pm006864_PmBEAT
Pm012986_PmCNL1
Pm019600_PmCNL10
Pm006110_PmCNL11
Pm021042_PmCNL12
Pm026124_PmCNL13
Pm008736_PmCNL14
Pm017552_PmCNL15
Pm006911_PmCNL16
Pm023838_PmCNL17
Pm024403_PmCNL18
Pm024474_PmCNL19
Pm026836_PmCNL2
Pm024473_PmCNL20
Pm001103_PmCNL21
Pm013494_PmCNL22
Pm023842_PmCNL23
Pm016229_PmCNL24
Pm012920_PmCNL25
Pm007958_PmCNL26
Pm004804_PmCNL27
Pm014946_PmCNL28
Pm003338_PmCNL29
Pm012962_PmCNL3
Pm024047_PmCNL30
Pm007734_PmCNL31
Pm021572_PmCNL32
Pm007744_PmCNL33
Pm010520_PmCNL34
Pm017325_PmCNL35
Pm012963_PmCNL36
Pm030237_PmCNL37
Pm022856_PmCNL4
Pm008298_PmCNL5
Pm012960_PmCNL6
Pm026842_PmCNL7
Pm026358_PmCNL8
Pm013887_PmCNL9
Pm010476_PmPAAS1
Pm010480_PmPAAS2
Pm020492_PmPAAS3
Pm010474_PmPAAS4
Pm010475_PmPAAS5
Pm010481_PmPAAS6
Pm030127_PmPAL1
Pm018524_PmPAL2
Pm013777_BAR1
Pm016504_BAR2
Pm017905_BAR3
Pm018403_BAR4
Pm020713_BAR5
Pm024067_BAR6
Pm029053_BAR7
Pm013776_BAR8
Pm013782_BAR9
Pm023202_BAR10
Pm022900_BAR11
Pm030674_CFAT1a
Pm013138_CFAT1b
Pm030672_CFAT1c
Pm023001_CFAT2
Pm023087_EGS1
Pm023086_EGS2
Pm023091_EGS3
Pm029006_EGS4
